1 **FSD1: a plastidial, nuclear and cytoplasmic enzyme relocating to the plasma membrane**  
2 **under salinity**

3 **Running title: Localization and osmoprotective role of FSD1 in *Arabidopsis***

4 Petr Dvořák, Yuliya Krasylenko, Miroslav Ovečka, Jasim Basheer, Veronika Zapletalová, Jozef  
5 Šamaj, Tomáš Takáč\*

6 Department of Cell Biology, Centre of the Region Haná for Biotechnological and Agricultural  
7 Research, Faculty of Science, Palacký University Olomouc, Šlechtitelů 27, Olomouc, 783 71,  
8 Czech Republic

9 \* Correspondence: Tomáš Takáč ([tomas.takac@upol.cz](mailto:tomas.takac@upol.cz))

10 **Abstract**

11 Here, we aimed to resolve the developmental expression and subcellular localization of  
12 *Arabidopsis* iron superoxide dismutase FSD1, which belongs to the family of superoxide  
13 dismutases (SODs), prominent enzymes decomposing superoxide anion and determining  
14 abiotic stress tolerance. We found that *fsd1* knockout mutants exhibit reduced lateral root  
15 number and that this phenotype was complemented by *proFSD1::GFP:FSD1* and  
16 *proFSD1::FSD1:GFP* constructs. Light sheet fluorescence microscopy revealed a temporary  
17 accumulation of FSD1-GFP at the site of endosperm rupture during seed germination. In  
18 emerged roots, FSD1-GFP showed the highest abundance in cells of the lateral root cap,  
19 columella, and endodermis/cortex initials. The largest subcellular pool of FSD1-GFP was  
20 localized in the plastid stroma, while it was also located in the nuclei and cytoplasm. FSD1 is  
21 crucial for seed germination and salt stress tolerance, which is tightly coupled with FSD1-GFP  
22 subcellular relocation to the plasma membrane. FSD1 is most likely involved in superoxide

23 decomposition in the periplasm. This study suggests a new osmoprotective function of SODs  
24 in plants.

25 **Key words:** superoxide dismutase, FSD1, development, plastid, seed germination, salt  
26 stress, primary root, lateral root, nucleus, cytoplasm, plasma membrane, osmoprotection,  
27 Hechtian strand, *Arabidopsis*

28

29 Plants, as aerobic organisms, have to deal with the harmful by-products of oxidative  
30 metabolism named reactive oxygen species (ROS), physiologically produced in organelles  
31 (chloroplasts, mitochondria, peroxisomes, glyoxysomes), cytosol, and apoplast. Moreover,  
32 ROS play regulatory and signalling roles during plant development and response to  
33 environmental challenges<sup>1-5</sup>. To regulate ROS levels, plants have developed adaptations and  
34 scavenging machineries<sup>6,7</sup>. Due to compartmentalized ROS production, the antioxidant system  
35 is present in different cellular compartments. However, the importance of developmental  
36 regulations, tissue-specific expression patterns, and subcellular localizations of antioxidant  
37 compounds are frequently underestimated in the current literature.

38 The key antioxidant players, which catalyze the dismutation of  $O_2^{\cdot -}$  into  $H_2O_2$ , are  
39 superoxide dismutases (SODs), metalloenzymes utilizing metal cofactors such as nickel  
40 (NiSOD; not present in higher plants), manganese (MnSOD), iron (FeSOD) and zinc-copper  
41 (Cu/ZnSOD)<sup>8</sup>. The *Arabidopsis* genome encodes three Cu/ZnSODs (CSD1, CSD2, CSD3), one  
42 MnSOD (MSD1) and three FeSODs (FSD1, FSD2, FSD3) isoforms<sup>9,10</sup>.

43 The subcellular localization of individual SODs is linked to the detoxification  
44 requirements. MSD is responsible for scavenging of the superoxide generated in mitochondria<sup>9</sup>.  
45 FSD2 and CSD2 are reported to be attached to the thylakoid membrane of chloroplasts<sup>11,12</sup>,  
46 while FSD3 is colocalized with the chloroplast nucleoids and protects them against superoxide  
47 radicals through the formation of a heterodimeric protein complex with FSD2<sup>12</sup>. In turn,

48 cytosolic localization is reported for two isoforms: CSD1 and FSD1<sup>9,12</sup>. Moreover, GFP-fusions  
49 suggest that FSD1 can localize to chloroplasts as well and deletion of the 11 amino-terminal  
50 nucleotides of FSD1 cDNA sequence restricted this protein to the cytosol<sup>13</sup>. However, the above  
51 mentioned studies relied on expression in either heterologous systems or protoplast cultures and  
52 there are currently no data on FSD1 *in vivo* localization *in planta*.

53 The absence or downregulation of some SODs cause phenotypic changes, suggesting  
54 their important roles in plant development. Knock-out *fsd2* and *fsd3* mutants display chlorotic  
55 phenotypes, abnormal chloroplast morphology and growth inhibition<sup>12</sup>. On the other hand, *fsd1*  
56 mutant does not show obvious phenotypes in green tissues or altered ROS levels in leaves when  
57 transferred into the dark for two days<sup>12</sup>. Nevertheless, overproduction of *Arabidopsis* FSD1 in  
58 *Zea mays* and *Nicotiana tabacum* caused increased tolerance against oxidative stress<sup>14,15</sup>. So  
59 far, root phenotypes of *fsd1* mutants have not been comprehensively studied. FSD1 protein  
60 shows high level of similarity with FSDs of agriculturally important crops such as *Brassica*  
61 *napus* (93% identity in amino acid sequence) or *Solanum lycopersicum* (75%) or *S. tuberosum*  
62 (74%), which is higher compared to *Arabidopsis* FSD2 (61%) and FSD3 (56%).

63 The major factor affecting FSD1 expression is the availability of copper in the culture  
64 medium, while Cu<sup>2+</sup> homeostasis is mainly regulated by the transcription factor SQUAMOSA  
65 promoter binding protein-like 7 (SPL7)<sup>16</sup>. The expression of *SPL7* and *FSD1* genes during the  
66 day-light period is regulated by circadian and diurnal rhythms<sup>17</sup>. Furthermore, FSD1 activity is  
67 mediated by direct interaction with chloroplast chaperonin 20 (CNP20)<sup>13</sup> and also by mitogen-  
68 activated protein kinases<sup>18</sup>.

69 In the present study, we aimed to gain new insights into the developmental expression  
70 and subcellular localization of FSD1 in *Arabidopsis* using advanced microscopy. We found that  
71 *FSD1* expression in living plants is tissue-specific and at the subcellular level, FSD1 localizes  
72 to the plastids, nuclei, and cytoplasm. Importantly, FSD1 was relocated to the plasma

73 membrane after salt stress, which was correlated with periplasmic ROS production. Generally,  
74 our results provide new evidence for the specific localization and novel osmoprotective role for  
75 FSD1 in *Arabidopsis*.

## 76 **Materials and Methods**

### 77 **Plant material and phenotyping**

78 *Arabidopsis* seeds were surface sterilized by ethanol and placed on a 1/2 Murashige and  
79 Skoog (MS) medium solidified with 0.5% (w/v) gellan gum and stratified at 4°C for 1-2 days,  
80 to synchronize germination. For the preparation of 1/2 MS medium with different copper  
81 content, final  $\text{CuSO}_4 \cdot 5\text{H}_2\text{O}$  concentrations were modified to 0  $\mu\text{M}$  and 0.5  $\mu\text{M}$ . Seedlings were  
82 grown vertically at 21°C, 16/8 h (light/dark) photoperiod with an illumination intensity of 150  
83  $\mu\text{mol m}^{-2} \text{s}^{-1}$  in a phytochamber (Weiss Technik, USA) for 1-15 days prior to imaging. For the  
84 preparation of etiolated plants, Petri plates were covered with aluminium foil.

85 *Arabidopsis* T-DNA knockout lines were obtained from the European Arabidopsis  
86 Stock Centre (<http://arabidopsis.info/BasicForm>; primers are listed in Supplementary Table 1).  
87 Two independent mutant lines *fsd1-1* (SALK\_029455) and *fsd1-2* (GABI\_740E11) were used,  
88 while the T-DNA insertion was confirmed by specific primers designed in the SIGnAL iSect  
89 tool (<http://signal.salk.edu/tdnaprimers.2.html>). Genomic DNA was isolated according to the  
90 manufacturer's instructions of the Phire Plant Direct PCR Kit (Thermo Fisher Scientific,  
91 F130WH) and homozygous lines of mutants were confirmed by PCR.

92 For the detailed root phenotyping, seedlings were recorded daily and documented using  
93 a scanner (ImageScanner TM III, Little Chalfont, UK) and ZOOM stereo microscope (Axio  
94 Zoom.V16; Carl Zeiss, Germany) for two weeks. The primary root lengths of 7- and 10- day-  
95 old seedlings were measured from the individual scans in ImageJ (<http://rsbweb.nih.gov/ij/>).

96 Lateral root number was counted on the 7<sup>th</sup> and 10<sup>th</sup> day after germination (DAG) and was  
97 standardized to the primary root length. The fresh weight of 14-day-old seedlings was  
98 measured. Phenotypic measurements were performed in three biological replicates (n=30) and  
99 the statistical significance was evaluated by one-way ANOVA test.

## 100 **Preparation of constructs and transgenic lines**

101 Both C- and N-terminal fusion constructs of *eGFP* with genomic DNA of *FSD1*  
102 (*pFSD1-FSD1::GFP:3'UTR-FSD1* (GFP-FSD1) and *pFSD1::GFP:FSD1-3'UTR-FSD1*  
103 (FSD1-GFP)) were cloned under its native promoter from *Arabidopsis* wild type (Col-0). The  
104 sequence of the native promoter was taken 1270 bp upstream of the start codon and for 3'UTR  
105 1070 bp downstream of the stop codon. MultiSite Gateway<sup>®</sup> Three-Fragment Vector  
106 Construction (Thermo Fisher Scientific, 12537-023) was used as the cloning method for the  
107 preparation of these constructs. Amplified sequences of the promoter, genomic DNA and  
108 3'UTR (primers are listed in Supplementary Table 1) were recombined into *pDONR<sup>TM</sup>P4-PIR*  
109 and *pDONR<sup>TM</sup>P2R-P3* donor vectors, where plasmids *pEN-L1-F-L2* with and without stop-  
110 codon were used as B fragment for the subsequent three-fragment vectors LR recombination  
111 into the destination vector *pB7m34GW*. Sequencing-validated cloning products were  
112 transformed into *Agrobacterium tumefaciens* GW3101, and used further for floral dip stable  
113 transformation of *fsd1-1* and *fsd1-2* mutants. Several transgenic lines possessing intense  
114 fluorescent signals have been selected from the T1 generation. Selected lines with one insertion  
115 were propagated into T3 homozygous generation and used in further experiments.

116 For immunoblotting analyses, a stably transformed *A. thaliana* G5 line expressing  
117 *35S:eGFP<sup>19</sup>* was used as a positive control for GFP detection.

## 118 **Immunoblotting and SOD activity assay**

119           Seedlings of each line were homogenized into fine powder in a mortar with liquid  
120 nitrogen. Proteins were extracted in E-buffer (50 mM HEPES pH 7.5, 75 mM NaCl, 1 mM  
121 EGTA, 1 mM MgCl<sub>2</sub>, 1 mM NaF, 10% (v/v) glycerol, PhosSTOP™ phosphatase inhibitor and  
122 Complete™ EDTA-free protease inhibitor cocktail (both from Roche, Basel, Switzerland)) and  
123 the extract was centrifuged (13 000 g) at 4°C for 15 min. Protein concentrations of supernatants  
124 were measured using the Bradford assay. Equal amounts of proteins were mixed with 4-fold  
125 concentrated Laemmli Sample Buffer (Bio-Rad, Hercules, CA, USA) and boiled at 95°C for 5  
126 min. Denatured protein extracts were separated by SDS-PAGE on 10% TGX Stain-Free™ Fast-  
127 Cast™ gels (Bio-Rad). Separated proteins were transferred to a polyvinylidene difluoride  
128 (PVDF) membrane (GE Healthcare, Little Chalfont, United Kingdom) using a wet tank unit  
129 (Bio-Rad) with Tris/glycine/methanol transfer buffer at 24 V and 4°C overnight. Nonspecific  
130 epitopes were blocked by overnight incubation of the membrane either in 5% (w/v) low-fat dry  
131 milk (for the detection of FSD1) or in 4% (w/v) low-fat dry milk and 4% (w/v) bovine serum  
132 albumin (for detection of GFP), both in Tris-buffered-saline with Tween 20 (TBS-T, 100 mM  
133 Tris-HCl; 150 mM NaCl; 0.1% Tween 20; pH 7.4). Subsequently, the membranes were  
134 incubated with anti-FSD primary antibody (Agrisera, dilution 1:3000 in TBS-T with 3% (w/v)  
135 low-fat dry milk) or anti-GFP (Sigma-Aldrich, dilution 1:1000 in TBS-T with 3% BSA)  
136 primary antibody at 4°C overnight. Following repeated washing in TBS-T, membranes were  
137 incubated with a secondary antibody diluted in TBS-T containing 1% (w/v) BSA for 1.5 h.  
138 Horseradish peroxidase-conjugated goat anti-rabbit and anti-mouse IgG secondary antibodies  
139 (both diluted 1:5000; Thermo Scientific) were used for the detection of FSD1 and GFP  
140 respectively. The signal was developed after five washing steps in TBS-T using the Clarity  
141 Western ECL substrate (Bio-Rad) and documented using the Chemidoc MP system (Bio-Rad).

142           For the analysis of SOD isoenzymatic activities, seedlings were homogenized in liquid  
143 nitrogen and subjected to protein extraction using 50 mM sodium phosphate buffer (pH 7.8), 1

144 mM ascorbate, 1 mM EDTA and 10% (v/v) glycerol. The extract was cleaned by centrifugation  
145 (13 000 g) at 4°C for 15 min, followed by measurement of the protein concentration. Samples  
146 of equal protein content were loaded on a 10% native PAGE gel and separated at constant 20  
147 mA/gel for 2 h. Gels were preincubated in 50 mM sodium phosphate buffer, pH 7.8 for 10 min  
148 after separation. SOD isoform activities and their specific inhibition were visualized as  
149 described by Takáč et al. (2014)<sup>18</sup>.

150 The band intensities in immunoblots and native gels were quantified using Image Lab  
151 software (Bio-Rad). Both analyses were performed in three biological replicates and the  
152 statistical significance was evaluated using one-way ANOVA test.

153

#### 154 **Quantitative analysis of transcript levels by quantitative real-time PCR**

155 Isolation of total RNA from 14-day-old *Arabidopsis* seedlings (Col-0, *fsd1-1*, *fsd1-2* and  
156 GFP-FSD1 transgenic line) and subsequent quantitative real-time PCR (qRT-PCR) were  
157 performed according to Smékalová et al., 2014<sup>20</sup>. Experiments were run in three biological and  
158 three technical replicates. The expression data were normalized to the expression of elongation  
159 factor 1-alpha (EF1 $\alpha$ ) used as a reference gene (primers are listed in Supplementary Table 1).  
160 Statistical significance was tested by one-way ANOVA test.

#### 161 **Whole mount immunofluorescence labelling**

162 *Arabidopsis* Col-0 and *fsd1* mutants grown on 1/2 MS medium were used at 3<sup>rd</sup> DAG  
163 for immunofluorescence labeling of the root tips according to the protocol established by  
164 Šamajová et al. (2014)<sup>21</sup> with minor modifications. Samples were incubated with rat anti-FSD1  
165 (Agrisera) primary antibody diluted at 1:250, in phosphate-buffered saline (PBS) containing  
166 3% (w/v) BSA at 4°C overnight. In the next step, samples were incubated with Alexa-Fluor  
167 488 conjugated goat anti-rat secondary antibody diluted at 1:500 in PBS with 3% (w/v) BSA at

168 room temperature for 3 h. DNA was counterstained with 250 µg/ml 4,6-diamidino-2-  
169 phenylindole (DAPI, Sigma-Aldrich) in PBS for 10 min. After a final wash in PBS, the  
170 specimens were mounted in an antifade solution (0.5% (w/v) p-phenylenediamine in 70% (v/v)  
171 glycerol in PBS or 1 M Tris-HCl, pH 8.0) or in the commercial antifade Vectashield™ (Vector  
172 Laboratories).

### 173 **Salt sensitivity assay and plasmolysis**

174 Germination analysis of Col-0, both *fsd1* mutants and *fsd1-1* complemented lines (GFP-  
175 FSD1 and FSD1-GFP) was performed on ½ MS medium with and without 150 mM NaCl.  
176 Plates with seeds were kept at 4°C for 2 days and incubated as mentioned above. Percentage of  
177 germinated seeds (with visible radicle) was counted under stereomicroscope after 24, 48, and  
178 78 hours. Measurements were performed in four repetitions (n=30) and statistical significance  
179 was tested by one-way ANOVA test.

180 For salt stress sensitivity determination, 4-day-old seedlings of Col-0, *fsd1* mutants and  
181 *fsd1-1* complemented lines (GFP-FSD1 and FSD1-GFP) growing on ½ MS medium were  
182 transplanted to ½ MS medium containing 150 mM NaCl. The ratio of bleached seedlings was  
183 counted at the 5<sup>th</sup> day after transfer. Measurements were performed in four repetitions (n=30)  
184 and the statistical significance was evaluated by one-way ANOVA test.

185 For plasmolysis induction, 4-day-old seedlings of *fsd1-1* complemented lines (FSD1-  
186 GFP and GFP-FSD1) were mounted between glass slide and coverslip in liquid 1/2 MS media.  
187 Plasmolysis was induced with 500 mM NaCl (hypocotyls) or 250 mM NaCl (roots) in liquid  
188 1/2 MS media applied by perfusion. Plasmolyzed cells were observed 5-30 min after the  
189 perfusion by CLSM 880 equipped with an Airyscan detector (ACLSM, Carl Zeiss, Germany)  
190 and a spinning disk microscope (Cell Observer, SD, Carl Zeiss, Germany).



## 191 **Histochemical and fluorescent detection of ROS**

192 To visualize superoxide production in roots, 7-day-old seedlings of Col-0, *fsd1* mutants  
193 and *fsd1-1* complemented lines were incubated in 10 mM potassium phosphate buffer (pH 7.8)  
194 containing 0.02% (w/v) 4-nitroblue tetrazolium chloride (NBT) for 5 min in dark. Stained  
195 seedlings were boiled in clearing solution containing 20% (v/v) acetic acid, 20% (v/v) glycerol  
196 and 60% (v/v) ethanol for 5 min and stored in mixture of 20% glycerol (v/v) and 80% (v/v)  
197 ethanol. Reduced NBT was visualized as a dark blue-colored formazan deposit.

198 ROS in plasmolyzed roots were visualized by incubation in 30  $\mu$ M 2',7'-  
199 dichlorodihydrofluorescein diacetate (CM-H<sub>2</sub>DCFDA), diluted in ½ MS with or without 250  
200 mM NaCl for 15 min in darkness. The emitted signal (excited at 492-495 nm) was recorded at  
201 517-527 nm using CLSM 720 (Carl Zeiss, Germany).

## 202 **Confocal laser scanning microscopy**

203 Seedlings of *fsd1-1* mutants carrying recombinant GFP-fused FSD1 were used for  
204 microscopy at 3<sup>th</sup>-8<sup>th</sup> DAG. Imaging of living or fixed samples was performed using a confocal  
205 laser scanning microscope LSM710 (Carl Zeiss, Germany), LSM880 equipped with an  
206 Airyscan (ACLSM, Carl Zeiss, Germany) and a spinning disk microscope (Cell Observer, SD,  
207 Carl Zeiss, Germany). Image acquisition was done with 20 $\times$  (0.8 NA) dry Plan-Apochromat,  
208 40 $\times$  (1.4 NA) and 63 $\times$  (1.4 NA) Plan-Apochromat oil-immersion objectives. Samples were  
209 imaged with a 488 nm excitation laser using emission filters BP420-480+BP495-550 for eGFP  
210 detection and BP 420-480 + LP 605 for chlorophyll *a* detection. Laser excitation intensity did  
211 not exceed 2% of the available laser intensity range. Immunolabelled samples were imaged  
212 using the excitation laser line 488 nm and emission spectrum 493-630 nm for Alexa-Fluor 488  
213 fluorescence detection, and excitation laser line 405 nm and emission spectrum 410-495 nm for  
214 DAPI. Living plants of 3<sup>th</sup>-8<sup>th</sup> DAG were stained with 4  $\mu$ M FM4-64 (Invitrogen, USA) diluted

215 in 1/2 liquid MS medium for 10 min before imaging. Samples were observed with excitation  
216 laser line 488 nm for eGFP detection and 561 nm for FM4-64 detection. Images were processed  
217 as maximum intensity projections of Z-stacks in Zen Blue 2012 software (Carl Zeiss, Jena,  
218 Germany), assembled and finalized in Microsoft PowerPoint to final figures.

## 219 **Light-sheet fluorescence microscopy**

220 Seeds of *fsd1-1* mutant expressing *proFSD1::FSD1:GFP* constructs were surface-  
221 sterilized and placed on 1/2 MS medium solidified with 0.5% (w/v) gellan gum and stratified  
222 at 4°C for 1-2 days. Subsequently, seeds were transferred to horizontally-oriented plates with  
223 the same culture medium and a height of at least 15 mm. Horizontal cultivation allowed seeds  
224 to germinate and roots to grow inside of a solidified medium. Seedlings were inserted into  
225 fluorinated ethylene propylene (FEP) tubes with an inner diameter of 2.8 mm and wall thickness  
226 of 0.2 mm (Wolf-Technik, Germany), in which roots grew in the block of the culture medium  
227 inside the FEP tube, while the upper green part of the seedling developed in an open space of  
228 the FEP tube with access to the air<sup>22</sup>. The FEP tube with seedling was inserted into a sample  
229 holder and placed into the observation chamber of the light-sheet Z.1 fluorescence microscope  
230 (Carl Zeiss, Germany). Before insertion of the sample into the microscope, plants were ejected  
231 slightly out of the FEP tube allowing for imaging of the root in the block of the solidified culture  
232 medium, but without the FEP tube. The sample chamber of the microscope was filled with  
233 sterile 1/2 MS medium and tempered to 22°C using the peltier heating/cooling system.  
234 Developmental live cell imaging was done with dual-side light-sheet illumination using two  
235 LSFM 10x/0.2 NA illumination objectives (Carl Zeiss, Germany) with excitation laser line 488  
236 nm, beam splitter LP 560 and with emission filter BP505-545. Image acquisition was done with  
237 a W Plan-Apochromat 20x/1.0 NA objective (Carl Zeiss, Germany) and images were recorded  
238 with the PCO. Edge sCMOS camera (PCO AG, Germany) with an exposure time of 100 ms  
239 and imaging frequency of every 2 min in the Z-stack mode for 2-20 hours.

## 240 **Results**

### 241 **FSD1 is developmentally regulated in the early post-germination phase of plant growth**

242 According to the public expression data deposited in the Genevestigator database<sup>10</sup>,  
243 *FSD1* is developmentally regulated and is abundantly expressed at early developmental stages.  
244 Generally, *FSD1* expression prevails at the vegetative growth phase, while *CSD1*, *CSD2* and  
245 *MSD1* isoforms are typically expressed during the reproductive phase<sup>10</sup>. Analysis of FSD1  
246 abundance and activity during *Arabidopsis* early seedling growth revealed that both parameters  
247 gradually increased from the 3<sup>rd</sup> to 13<sup>th</sup> DAG, but significantly decreased in following days  
248 (Fig. 1a-d). In order to address the possible phenotypic consequences of FSD1 deficiency at  
249 early developmental stages, two independent homozygous T-DNA insertion *fsd1* mutants were  
250 analyzed. It was found that both mutants exhibited reduced lateral root density, while no  
251 significant difference was found in the primary root length and seedling fresh weight compared  
252 to the wild type (Fig. 1e-h). In summary, our data suggest that, FSD1 activity and abundance  
253 in *Arabidopsis* depends on the growth phase and its deficiency leads to reduced lateral root  
254 numbers.

### 255 **Functional complementation of *fsd1* mutants**

256 For the elucidation of FSD1 expression and localization *in vivo*, we generated stably  
257 transformed *fsd1* mutants carrying FSD1 under its own native promoter and fused with GFP.  
258 Both N- and C-terminal GFP fusions were cloned and individually introduced into *fsd1* mutants.  
259 FSD1 complementation reverted the lateral root phenotypes of *fsd1* mutants (Fig. 2a). In  
260 addition, primary root length (Fig. 2b), lateral root density (Fig. 2c), and seedling fresh weight  
261 (Fig. 2d) in complemented lines slightly exceeded the respective values in wild-type plants.  
262 Neither FSD1 protein presence, nor enzymatic activity were observed in *fsd1* mutants by  
263 biochemical analyses (Fig. 2e-h), while GFP-tagged FSD1 proteins (FSD1-GFP or GFP-FSD1)

264 were detected in both complemented lines (Fig. 2e-h, Supplementary Fig. 1). Quantitatively,  
265 wild type-like level of FSD1 activity and abundance was found in FSD1-GFP complemented  
266 plants, as examined by both anti-FSD (Fig. 2e, f) and anti-GFP antibodies (Supplementary Fig.  
267 1). On the other hand, strongly reduced (representing 70% and 56% of wild type as examined  
268 by anti-FSD and anti-GFP antibodies, respectively) protein levels were found in the GFP-FSD1  
269 complemented line (Fig. 2e, f, and Supplementary Fig. 1). Quantitative PCR analysis showed  
270 that *FSD1* transcript levels were similar to wild type (Supplementary Fig. 2). Functionality of  
271 the FSD1 proteins fused with GFP in both complemented lines was shown by the detection of  
272 their activities (Fig. 2g, h). Moreover, FSD1 activities and abundances of both GFP-FSD1 and  
273 FSD1-GFP were sensitive to copper content in cultivation media, further confirming their  
274 functionality (Supplementary Fig. 3).

275 Inhibition of FSD1 activity by H<sub>2</sub>O<sub>2</sub>, but not by KCN suggests that the bands on the  
276 native PAGE gels correspond to FSD1 proteins fused with GFP (Supplementary Fig. 4). FSD1  
277 activities in the transgenic lines quantitatively correlate with the abundances of the respective  
278 fused and native proteins (Fig. 2g, h and Supplementary Fig. 4a). Interestingly, the band  
279 corresponding to GFP-FSD1, migrated in a distinct manner as compared to FSD1-GFP on the  
280 native PAGE gel (Fig. 2g). We also tested whether these manipulations with FSD1 expression  
281 resulted in different endogenous levels of superoxide. The histochemical examination of  
282 superoxide in mutant and transgenic lines did not show any differences in comparison to the  
283 wild type or among the lines (Supplementary Fig. 5).

284 Together, these results suggest that FSD1 is important for the fine-tuning of the lateral  
285 root development.

## 286 **Expression pattern of FSD1-GFP during germination and early seedling development**

287 Spatial and temporal patterns of FSD1-GFP expression in the early stages of  
288 development were monitored *in vivo* using light-sheet fluorescence microscopy. This allowed

289 the time-lapse monitoring of FSD1-GFP distribution during the whole process of seed  
290 germination at nearly environmental conditions (Fig. 3, Supplementary Video 1). Within the  
291 first 6 h of seed germination, still before radicle emergence, we observed an increase of FSD1-  
292 GFP signal in the micropylar endosperm with a maximum at the future site of radicle protrusion  
293 (Fig. 3a-g, Supplementary Video 1). With the endosperm rupture and emergence of the primary  
294 root, FSD1-GFP signal gradually decreased in the micropylar endosperm (Fig. 3h-j), while a  
295 strong FSD1-GFP signal appeared in the fast-growing primary root (Fig. 3k, l, Supplementary  
296 Video 1). Strong expression of FSD1-GFP was visualized in the transition and elongation zones  
297 of the primary root (Fig. 3l, m, Supplementary Video 1), which was, however, gradually  
298 decreasing in the differentiation zone, particularly after the emergence of the root hairs in the  
299 collar region (Fig. 3m-o). During seed germination, FSD1-GFP-labelled plastids in endosperm  
300 cells showed a high degree of motility (Supplementary Video 1). Thus, FSD1 may be involved  
301 in the process of endosperm rupture during seed germination. Moreover, FSD1 tissue-specific  
302 expression might play a protective role during early root emergence from seeds.

303         After germination, which occurred during the 1<sup>st</sup> DAG, growth of the primary root  
304 continued and cotyledons were released from the seed coat during the 2<sup>nd</sup> DAG (Supplementary  
305 Fig. 6a, b). Expression levels of FSD1-GFP in emerging cotyledons were high (Supplementary  
306 Fig. 6b). Hypocotyl and fully opened cotyledons in developing seedlings at 5<sup>th</sup> DAG contained  
307 moderate amount of FSD1-GFP, while the strongest signal was detectable in the shoot apex and  
308 emerging first true leaves (Supplementary Fig. 6c). FSD1-GFP signal considerably increased  
309 in the lateral root primordia (Supplementary Fig. 6d-f). Accumulation of FSD1-GFP was still  
310 visible in the apices of the lateral roots as well as in the basal parts, at the connection of the  
311 lateral roots to the primary root (Supplementary Fig. 6g). In growing apex of the primary root,  
312 the strongest FSD1-GFP signal was located in the transition zone (Supplementary Fig. 6h). The

313 FSD1-GFP signal gradually decreased with acceleration of the cell elongation, differentiation,  
314 and root hair formation (Supplementary Fig. 6h, Supplementary Video 2).

### 315 **Tissue-specific subcellular localization of GFP-FSD1 and FSD1-GFP in *Arabidopsis***

316 In the cells of both above- and underground organs of light-exposed seedlings of *fsd1-*  
317 *1* mutants harboring *proFSD1::FSD1:GFP* construct, C-terminal FSD1-GFP fusion protein  
318 was localized in plastids, nuclei, and cytoplasm, especially in the cortical cytoplasmic layer in  
319 close proximity to the plasma membrane (Supplementary Videos 3 and 4). Such localization  
320 patterns of FSD1-GFP was consistent in cells of all aboveground organs in light-exposed  
321 seedlings, such as cotyledon epidermis (mature pavement cells, stomata and their precursors,  
322 Fig. 4a-c; Supplementary Videos 3 and 4), leaf mesophyll cells (Fig. 4d-f, Supplementary Video  
323 5), hypocotyl epidermis (Fig. 4g), and first true leaf epidermis with branched trichomes (Fig.  
324 4h). In leaf pavement cells, FSD1-GFP-labelled plastids were located around the nucleus and  
325 in the cytoplasmic strands traversing the vacuole (Fig. 4a). Plastids located in cytoplasmic  
326 strands actively followed other organelles during cyclosis (Supplementary Video 3 and 4).  
327 Some other FSD1-GFP-labelled plastids located in a close proximity to nuclei in stomata guard  
328 cells and adjacent pavement cells, were less dynamic (Supplementary Videos 3 and 4). In  
329 mesophyll cells, FSD1-GFP-labelled plastids were temporarily contacted and eventually  
330 interconnected by the highly dynamic network of tubules and cisternae of the endoplasmic  
331 reticulum (Supplementary Video 5).

332 Moreover, FSD1-GFP maintained the same pattern of its localization in cotyledon  
333 epidermal cells of etiolated *Arabidopsis* seedlings, although it was more intensively  
334 accumulated in the cortical cytoplasm just beneath the plasma membrane as compared to the  
335 light-exposed plants (Supplementary Fig. 7). In turn, FSD1-GFP was abundant in etioplasts,  
336 showing only basal remaining level of chlorophyll *a* autofluorescence (Supplementary Fig. 7b,  
337 c).

338 Plastidial, nuclear and cytoplasmic localization of FSD1-GFP was detected also in cells  
339 of the root apex (Fig. 5a, Supplementary Video 6). This localization pattern was visible in cells  
340 of the lateral root cap (Fig. 5a, b, c), in meristematic cells (Fig. 5a, c), epidermal cells of  
341 elongation zone (Fig. 5d, e) as well as in trichoblasts within the differentiation zone (Fig. 5f) of  
342 primary root. The selective styryl dye FM4-64 counterstaining of the plasma membrane in root  
343 cells helped to reveal tissue-specific FSD1-GFP localization in the root tip (Supplementary Fig.  
344 8). It showed lower GFP-FSD1 signal intensity in central columella cells (Fig. 5a,  
345 Supplementary Fig. 8).

346 Furthermore, accumulation of FSD1-GFP was observed in the lateral root primordia  
347 emerging from the pericycle (Fig. 5k-n). FSD1-GFP signal increased first in cells of forming  
348 lateral root primordium still enclosed by tissues of the primary root (Fig. 5k, Supplementary  
349 Fig. 9a-c). Strong signal of FSD1-GFP was found in cells of the central region, where the apical  
350 meristem of the emerging lateral root was established (Fig. 5l, m). Considerably high levels of  
351 FSD1-GFP also persisted during the release of the lateral root from the primary root tissue (Fig.  
352 5n, Supplementary Fig. 9d-f). Established apex of elongating lateral root showed differential  
353 pattern of FSD1-GFP expression, with high levels in the endodermis/cortex initials  
354 (Supplementary Fig. 9g-i, Supplementary Video ), actively dividing cells of the epidermis,  
355 cortex and endodermis, and lateral root cap cells (Supplementary Fig. 9g-i). On the other hand,  
356 considerably lower levels of FSD1-GFP occurred in cells of the quiescence center and  
357 columella (Supplementary Fig. 9g-i).

358 The process of root hair formation from trichoblasts was connected with the  
359 accumulation of FSD1-GFP in the cortical cytoplasm of the emerging bulge (Fig. 5g). In tip-  
360 growing root hairs, FSD1-GFP accumulated in the apical and subapical zone (Fig. 5h, i). It is  
361 noteworthy that after the termination of root hair elongation, FSD1-GFP signal (Fig. 5j)

362 dropped at the tip, while typical strong plastidial signal appeared in the cortical cytoplasm (Fig.  
363 5j).

364 Subcellular localization pattern of FSD1 was confirmed by the whole mount  
365 immunofluorescence localization method in fixed samples using anti-FSD antibody. This  
366 technique showed prominent strong immunolocalization of FSD1 to plastids distributed around  
367 nuclei and in the cytoplasm, as well as nuclear and cytoplasmic localization in meristematic  
368 cells of the primary root (Fig. 6a-f).

369 Interestingly, the N-terminal GFP-FSD1 fusion protein was not targeted to plastids, but  
370 it was localized both in the nuclei and cytoplasm. This localization pattern was observed in leaf  
371 pavement (Supplementary Video 7) and stomata guard cells (Supplementary Fig. 10a-c), in  
372 cotyledon mesophyll cells (Supplementary Fig. 10d-f) as well as in hypocotyl epidermal cells  
373 (Supplementary Fig. 10g, Supplementary Video 8). The absence of plastidial localization did  
374 not affect the tissue-specific expression pattern of GFP-FSD1 in primary root apex. The  
375 strongest signal was located in the epidermis, cortex, endodermis, and root cap (Supplementary  
376 Fig. 10h). Considerably lower GFP-FSD1 signal was detected in the quiescent center, central  
377 columella cells and proliferating tissues of the central cylinder (Supplementary Fig. 10h).  
378 Strong accumulation of GFP-FSD1 was typically present in founding cells of the lateral root  
379 primordia and adjacent pericycle cells (Supplementary Fig. 10i). Taking into account the strong  
380 reduction in FSD1 abundance and activity in transgenic line expressing N-terminal GFP-FSD1  
381 fusion as compared to FSD1-GFP (Fig. 2e-h, Supplementary Fig. 1), the plastidic FSD1 pool  
382 may represent around half of the total FSD1 pool in *Arabidopsis* cells. Notably, the level of  
383 *FSD1* transcripts in GFP-FSD1 line was comparable to the wild-type transcript level  
384 (Supplementary Fig. 2), indicating possible degradation of plastid-targeted FSD1 in the GFP-  
385 FSD1 line.



386 Plastids were the organelles most strongly accumulating FSD1-GFP and located either  
387 around the nuclei or distributed throughout the cytoplasm (Fig. 4, Fig. 5, Supplementary Fig.  
388 7, Supplementary Video 3 and 4). Typically, plastids in cells of different tissues formed  
389 polymorphic stromules, which displayed different tissue-specific shape, length, branching (Fig.  
390 4, Fig. 5) and dynamicity (Supplementary Videos 3,5). Thus, in lateral root cap cells highly  
391 dynamic FSD1-GFP-labelled plastids persistently formed long stromules, touching each other  
392 (Fig. 5b, Supplementary Video 9), while the plastids in isodiametric meristematic cells  
393 possessed less stromules (Fig. 5c, d). In hypocotyl epidermal cells with active cytoplasmic  
394 streaming, only some plastids were interconnected by stromules (Supplementary Video 10).  
395 Since stromules are tubular plastid extensions filled with stroma<sup>23</sup>, FSD1 might be considered  
396 a stromal protein. In contrast to FSD2 and FSD3<sup>12</sup>, FSD1 was not detected in the chloroplast  
397 nucleoids.

### 398 **FSD1 contributes to salt stress tolerance in *Arabidopsis* by superoxide conversion in the** 399 **periplasm**

400 Protective role of FSD1 during the early stages of post-embryonic plant development  
401 was tested in *fsd1* mutants and complemented lines on seed germination under salt stress  
402 conditions. Seed germination of *fsd1* mutants was strongly reduced by the presence of 150 mM  
403 NaCl in the 1/2 MS medium, while FSD1-GFP lines exhibited germination rates comparable to  
404 that of wild type. GFP-FSD1 line showed an insignificantly reduced germination rate on the 1<sup>st</sup>  
405 day, but germination efficiency was synchronized with wild type and FSD1-GFP line from the  
406 2<sup>nd</sup> day onwards (Fig. 7a). The results indicated that FSD1 expressed under its own native  
407 promotor functionally complemented the salt stress-related deficiency of *fsd1* mutants.

408 To further test the new role of FSD1 in salt stress sensitivity, we characterized the  
409 response of developing seedlings to the high salt concentration in the culture medium. We found  
410 that both *fsd1* mutants showed hypersensitivity to NaCl and exhibited increased cotyledon

411 bleaching. Both FSD1-GFP and GFP-FSD1 fusion proteins efficiently reverted the salt  
412 hypersensitivity of *fsd1* mutants (Fig. 7b, Supplementary Fig. 11). These results supported the  
413 new functional role of FSD1 in *Arabidopsis* salt stress tolerance.

414 To gain deeper insight into FSD1 function during plant response to the salt stress, we  
415 performed subcellular localization of FSD1-GFP in hypocotyl epidermal cells plasmolyzed by  
416 500 mM NaCl (Fig. 7c-i, Supplementary Fig. 12). In addition to plastidial, nuclear, and  
417 cytoplasmic localization in untreated cells (Fig. 7c), FSD1-GFP was detected in Hechtian  
418 strands and Hechtian reticulum, interconnecting retracted protoplast with the cell wall of  
419 plasmolyzed cells (Fig. 7d-i). Hechtian reticulum located in close proximity to the cell wall  
420 (Fig. 7f), and thin attachments of Hechtian strands to peripheral Hechtian reticulum in the form  
421 of bright spots (Fig. 7e, g-i) were enriched with FSD1-GFP (Fig. 7h, i, Supplementary Fig. 12).  
422 Plasmolyzed cells showed strong GFP signal at plasma membrane and also contained vesicle-  
423 like structures decorated by FSD1-GFP, in their cytoplasm (Supplementary Fig. 12d) and also  
424 within the Hechtian strands (Fig. 7h). We observed a similar relocation pattern in the GFP-  
425 FSD1 line. GFP-FSD1 was located in the nuclei and cytoplasm of untreated cells (Fig. 7j), while  
426 prominent GFP-FSD1 accumulation was observed at the plasma membrane of retracted  
427 protoplasts, in Hechtian strands and reticulum after plasmolysis (Fig. 7k-p). Peripheral  
428 Hechtian reticulum and strands were decorated by spot- and vesicle-like structures labelled with  
429 GFP-FSD1 (Fig. 7l, p).

430 Subcellular localization during the plasmolysis induced by salt stress implies that FSD1  
431 could be involved in the ROS production within the periplasmic space. Therefore, we used a  
432 fluorescent ROS indicator CM-H<sub>2</sub>DCFDA, which is preferentially specific to H<sub>2</sub>O<sub>2</sub><sup>24</sup>, for  
433 intracellular ROS localization in plasmolyzed cells. We have found that the CM-H<sub>2</sub>DCFDA  
434 fluorescence signal highly correlated with the subcellular distribution of GFP-tagged FSD1  
435 after plasmolysis (Fig. 8a-f; Supplementary Fig. 13a, b). Intense ROS production was detected

436 in the cytoplasm of retracted protoplasts (Fig. 8a), as well as in Hechtian strands and reticulum  
437 connecting them to the cell walls (Fig. 8a). Interestingly, branched Hechtian reticulum (Fig. 8a,  
438 d), vesicular-like structures within Hechtian strands (Fig. 8a-c) and connecting points of  
439 Hechtian strands to the cell wall (Fig. 8a, f) were the places of intense ROS production.  
440 Collectively, these data indicate that at least some part of salt stress-induced ROS production  
441 and accumulation at the plasma membrane and Hechtian strands and reticulum depends on  
442 relocated FSD1.

## 443 **Discussion**

444 FeSODs were long believed to be chloroplast proteins involved in superoxide  
445 scavenging during photosynthesis. However, the scavenging capacity of *Arabidopsis* FSD1 was  
446 challenged, because its transcript levels remained unchanged in response to many  
447 environmental conditions<sup>9,12,25,26</sup>. Here, we show for the first time that FSD1 is localized not  
448 only in plastids, but simultaneously also in the nuclei and cytoplasm of *Arabidopsis* cells.  
449 Moreover, FSD1 relocates to the plasma membrane under salt stress conditions.

## 450 **FSD1 might protect root proliferation activity under adverse environmental conditions**

451 Using translational fusion constructs with native promoter, GFP-tagged FSD1 exhibited  
452 a tissue-specific expression pattern in *Arabidopsis* root tip. This indicates that FSD1 may also  
453 have developmental roles that are conditionally determined. Hence, FSD1 might be involved in  
454 the regulation of the redox status in dividing cells, like root initials. It is known that the root  
455 meristematic activity as well as the quiescent center organization is maintained by redox  
456 homeostasis which acts downstream of the auxin transport<sup>26-29</sup>. Intriguingly, FSD1 tissue-  
457 dependent expression pattern largely correlates with auxin maxima in the root tip<sup>30,31</sup>, as well  
458 as with superoxide anion maxima<sup>32</sup>. Furthermore, endodermis formation requires

459 *SCARECROW* (*SCR*) and *SHORTROOT* (*SHR*), two GRAS-type transcription factors,  
460 expressed in the endodermis/cortex initials and quiescent center<sup>33,34</sup>. FSD1 might also  
461 contribute to the regulation of *SCR* and *SHR*, which is supported by the high expression of  
462 *FSD1* in fluorescence-activated cell sorting (FACS)-isolated protoplasts expressing  
463 endoplasmic reticulum targeted GFP under the control of the *SCARECROW* promoter<sup>35</sup>. This  
464 expression was elevated in salt-stressed protoplasts. Considering our results about the role of  
465 FSD1 in salt stress tolerance, FSD1 may be involved in the maintenance of redox homeostasis  
466 in the endodermis/cortex initials of the root tip.

#### 467 **FSD1 is required for *Arabidopsis* response to the salt stress**

468 Our localization data suggest that FSD1 functions are not only restricted to the  
469 cytoplasm and plastids, because we provide here the first evidence on the nuclear localization  
470 of superoxide dismutase in plants. It was previously found that mammalian SOD1 is rapidly  
471 relocated to the nucleus upon H<sub>2</sub>O<sub>2</sub> triggered oxidative stress<sup>36</sup>. In this case, SOD1 binds to  
472 specific DNA nucleotide sequences and triggers the expression of genes involved in oxidative  
473 resistance and DNA repair. It may also bind to and regulate the stability of specific mRNAs<sup>36</sup>.  
474 SOD1 nuclear functions are unrelated to its catalyzing of superoxide removal<sup>37</sup>. Nucleotide  
475 sequences of *FSD1* as well as structure of FSD1 catalytic and other domains differ considerably  
476 from SOD1<sup>10</sup>. Thus, the nuclear function of FSD1 cannot be easily anticipated, but it certainly  
477 deserves further study.

478 The localization of FSD1 to chloroplasts is determined by an N-terminal transit peptide  
479 identified previously<sup>13</sup>. According to comparative studies of three *Arabidopsis* isoforms, FSD1  
480 is crucial neither for chloroplast integrity<sup>12</sup>, nor for cell protection under photooxidative stress<sup>26</sup>.  
481 It is likely that the protective role of FSD1 depends on the severity of the external conditions  
482 and might be triggered under harsh stress conditions. The protective roles of FSD1 were  
483 reported in transgenic tobacco and maize, where overexpression of this enzyme in chloroplasts

484 enhanced the efficiency of thylakoid and plasma membrane protection<sup>14,15</sup>. Our results suggest  
485 that FSD1 is important for *Arabidopsis* germination under salt stress and salt stress tolerance.  
486 As indicated by the salt stress response of the complemented lines, cytosolic and likely also  
487 nuclear FSD1 pools are crucial for the acquisition of full tolerance to salinity during  
488 germination. Altogether, our results emphasize the importance of FSD1 in the regulation of  
489 cytosolic and also possibly nuclear redox homeostasis in response to salinity stress.

### 490 **Salt-induced relocation of FSD1 to the plasma membrane and periplasmic ROS** 491 **production**

492 Plasmolysis is a primary consequence of salt (osmotic) shock in plants<sup>38,39</sup>. Our data  
493 showed strong accumulation of FSD1 in Hechtian strands and reticulum during plasmolysis.  
494 These tubular structures are plasma membrane extensions providing a physical connection  
495 between the retracted protoplasts and the cell wall<sup>38</sup>. The protoplast shrinkage and formation of  
496 Hechtian strands is accompanied by rapid plasma membrane remodeling and modifications<sup>40</sup>,  
497 likely driven by the documented generation of ROS, which are known to affect the plasma  
498 membrane properties by lipid peroxidation<sup>41</sup>. Therefore, we suggest that FSD1 is relocated to  
499 the plasma membrane during salt shock in order to control ROS-mediated plasma membrane  
500 modifications in Hechtian strands and reticulum during plasmolysis. Such function might be  
501 assigned also to thioredoxin H9 which has similar periplasmic localization<sup>42</sup>. The plasma  
502 membrane localization of FSD1, which was also experimentally confirmed in several proteomic  
503 studies<sup>43-45</sup>, is most likely mediated by two predicted hydrophobic helices<sup>46</sup>. The  
504 EEFNAAAATQFGAGWAWLAY region was significantly predicted to have an extracellular  
505 orientation (Supplementary Fig. 14).

### 506 **FSD1 is likely involved in endosperm rupture during seed germination**

507 Seed germination is a complex process encompassing multiple events governed by tight  
508 phytohormonal regulation. Micropylar endosperm represents the last mechanical barrier  
509 constraining the radicle emergence. Endosperm rupture is preceded by its weakening,  
510 controlled by the inhibitory effect of abscisic acid (ABA) and promoting effect of ethylene<sup>47</sup>.  
511 Furthermore, ROS contribute to this process by oxidizing the cell wall polysaccharides and  
512 subsequent cell wall loosening<sup>48</sup>. Here, we provide data showing FSD1 upregulation and local  
513 accumulation in the micropylar endosperm during endosperm weakening and rupture, which is  
514 subsequently decreased after primary root emergence. Such accumulation of FSD1-GFP at the  
515 micropylar endosperm before and during endosperm rupture by emerging radicle indicates that  
516 it may be involved in the local catalysis of superoxide conversion to hydrogen peroxide. Indeed,  
517 *FSD1* shows unique transcriptional changes during seed germination in comparison to other  
518 SOD isoforms<sup>48</sup>, supporting the specific role of FSD1 during endosperm weakening and  
519 rupture.

520 In summary, we show developmentally regulated tissue-specific expression pattern,  
521 triple subcellular localization and provide evidence for the new role of FSD1 in the salt stress,  
522 which is unique among plant SODs. These new features make FSD1 favorable candidate for  
523 potential biotechnological applications.

## 524 **Author Contributions**

525 PD, YK, JB, VZ and MO performed the experiments and analyses. TT coordinated the  
526 experiments, supervised the project and helped with data assessment. JŠ provided the  
527 infrastructure and helped with the interpretation of the results. PD, YK and TT drafted the  
528 manuscript which was revised and edited by MO and JŠ. All authors approved the final version  
529 of the manuscript.

## 530 **Acknowledgements**

531 This research was funded by Grant No. 19-00598S from the Czech Science Foundation  
532 GAČR and by the ERDF project “Plants as a tool for sustainable global development”  
533 (No.CZ.02.1.01/0.0/0.0/16\_019/0000827). We thank to Dr. O. Šamajová for her valuable  
534 advices during microscopic observations. We are also thankful to Michael Wrzaczek for critical  
535 reading of the manuscript.

## 536 **Data availability**

537 Data from this study are available within the paper and the Supplementary Information  
538 or from the corresponding authors upon request.

## 539 **References**

- 540 1. Smékalová, V., Doskočilová, A., Komis, G. & Šamaj, J. Crosstalk between secondary  
541 messengers, hormones and MAPK modules during abiotic stress signalling in plants.  
542 *Biotechnol. Adv.* **32**, 2–11 (2014).
- 543 2. Mittler, R. ROS are good. *Trends Plant Sci.* **22**, 11–19 (2017).
- 544 3. Wrzaczek, M., Brosché, M. & Kangasjärvi, J. ROS signaling loops - production,  
545 perception, regulation. *Curr. Opin. Plant Biol.* **16**, 575–582 (2013).
- 546 4. Orman-Ligeza, B. et al. RBOH-mediated ROS production facilitates lateral root emergence  
547 in *Arabidopsis*. *Development* **143**, 3328–3339 (2016).
- 548 5. Waszczak, C., Carmody, M. & Kangasjärvi, J. Reactive oxygen species in plant signaling.  
549 *Annu. Rev. Plant Biol.* **69**, 209–236 (2018).

- 550 6. Foyer, C. H. & Noctor, G. Redox homeostasis and antioxidant signaling: a metabolic  
551 interface between stress perception and physiological responses. *Plant Cell* **17**, 1866–1875  
552 (2005).
- 553 7. Noctor, G., Reichheld, J. P. & Foyer, C. H. ROS-related redox regulation and signaling in  
554 plants. *Semin. Cell Dev. Biol.* **80**, 3–12 (2017).
- 555 8. Sheng, Y. et al. Superoxide dismutases and superoxide reductases. *Chem. Rev.* **114**, 3854–  
556 3918 (2014).
- 557 9. Kliebenstein, D. J., Monde, R. A. & Last, R. L. Superoxide dismutase in *Arabidopsis*: an  
558 eclectic enzyme family with disparate regulation and protein localization. *Plant Physiol.*  
559 **118**, 637–650 (1998).
- 560 10. Pilon, M., Ravet, K. & Tapken, W. The biogenesis and physiological function of chloroplast  
561 superoxide dismutases. *Biochim. Biophys. Acta (BBA) - Bioenergetics* **1807**, 989–998  
562 (2011).
- 563 11. Ogawa, K., Kanematsu S., Takabe K. & Asada K. Attachment of CuZn-superoxide  
564 dismutase to thylakoid membranes at the site of superoxide generation (PSI) in spinach  
565 chloroplasts: detection by immuno-gold labeling after rapid freezing and substitution  
566 method. *Plant Cell Physiol.* **36**, 565–573 (1995).
- 567 12. Myouga, F. et al. A heterocomplex of iron superoxide dismutases defends chloroplast  
568 nucleoids against oxidative stress and is essential for chloroplast development in  
569 *Arabidopsis*. *Plant Cell* **20**, 3148–3162 (2008).
- 570 13. Kuo, W. Y. et al. CHAPERONIN 20 mediates iron superoxide dismutase (FeSOD) activity  
571 independent of its co-chaperonin role in *Arabidopsis* chloroplasts. *New Phytol.* **197**, 99–  
572 110 (2013).



- 573 14. Van Camp, W., Capiou, K., Van Montagu, M., Inzé, D. & Slooten, L. Enhancement of  
574 oxidative stress tolerance in transgenic tobacco plants overproducing Fe-superoxide  
575 dismutase in chloroplasts. *Plant Physiol.* **112**, 1703–1714 (1996).
- 576 15. Van Breusegem, F. et al. Overproduction of *Arabidopsis thaliana* FeSOD confers oxidative  
577 stress tolerance to transgenic maize. *Plant Cell Physiol.* **40**, 515–523 (1999).
- 578 16. Yamasaki, H., Hayashi, M., Fukazawa, M., Kobayashi, Y. & Shikanai, T. SQUAMOSA  
579 promoter binding protein-like7 is a central regulator for copper homeostasis in *Arabidopsis*.  
580 *Plant Cell.* **21**, 347–361 (2009).
- 581 17. Perea-García, A. et al. Modulation of copper deficiency responses by diurnal and circadian  
582 rhythms in *Arabidopsis thaliana*. *J. Exp. Bot.* **67**, 391–403 (2016).
- 583 18. Takáč, T. et al. Proteomic and biochemical analyses show functional network of proteins  
584 involved in antioxidant defense of *Arabidopsis anp2anp3* double mutant. *J. Proteome Res.*  
585 **13**, 5347–5361 (2014).
- 586 19. Ovečka, M. et al. Salt-induced subcellular kinase relocation and seedling susceptibility  
587 caused by overexpression of Medicago SIMKK in *Arabidopsis*. *J. Exp. Bot.* **65**, 2335–2350  
588 (2014).
- 589 20. Smékalová, V. et al. Involvement of YODA and mitogen activated protein kinase 6 in  
590 *Arabidopsis* post-embryogenic root development through auxin up-regulation and cell  
591 division plane orientation. *New Phytol.* **203**, 1175–1193 (2014).
- 592 21. Šamajová, O., Komis, G. & Šamaj, J. Immunofluorescent localization of MAPKs and  
593 colocalization with microtubules in *Arabidopsis* seedling whole-mount probes. *Methods*  
594 *Mol. Biol.* **1171**, 107–115 (2014).
- 595 22. Ovečka, M. et al. Preparation of plants for developmental and cellular imaging by light-  
596 sheet microscopy. *Nat. Protoc.* **10**, 1234–1247 (2015).

- 597 23. Köhler, R. H. & Hanson, M. R. Plastid tubules of higher plants are tissue-specific and  
598 developmentally regulated. *J. Cell. Sci.* **113** (Pt 1), 81–89 (2000).
- 599 24. Kristiansen, K. A., Jensen, P. E., Møller, I. M. & Schulz, A. Monitoring reactive oxygen  
600 species formation and localisation in living cells by use of the fluorescent probe CM-  
601 H<sub>2</sub>DCFDA and confocal laser microscopy. *Physiol. Plant.* **136**, 369–383 (2009).
- 602 25. Xing, Y., Chen, W., Jia, W. & Zhang, J. Mitogen-activated protein kinase kinase 5  
603 (MKK5)-mediated signalling cascade regulates expression of iron superoxide dismutase  
604 gene in *Arabidopsis* under salinity stress. *J. Exp. Bot.* **66**, 5971–5981 (2015).
- 605 26. Gallie, D. R. & Chen, Z. Chloroplast-localized iron superoxide dismutases FSD2 and FSD3  
606 are functionally distinct in *Arabidopsis*. *PLoS ONE* **14**, e0220078 (2019).
- 607 27. Jiang, K. Quiescent center formation in maize roots is associated with an auxin-regulated  
608 oxidizing environment. *Development* **130**, 1429–1438 (2003).
- 609 28. Barlow, P. W. Origin of the concept of the quiescent centre of plant roots. *Protoplasma*  
610 **253**, 1283–1297 (2016).
- 611 29. Horváth, E. et al. The *Arabidopsis* glutathione transferases, AtGSTF8 and AtGSTU19 are  
612 involved in the maintenance of root redox homeostasis affecting meristem size and salt  
613 stress sensitivity. *Plant Sci.* **283**, 366–374 (2019).
- 614 30. Petersson, S. V. et al. An auxin gradient and maximum in the *Arabidopsis* root apex shown  
615 by high-resolution cell-specific analysis of IAA distribution and synthesis. *Plant Cell* **21**,  
616 1659–1668 (2009).
- 617 31. Hayashi, K. et al. Auxin transport sites are visualized in planta using fluorescent auxin  
618 analogs. *Proc. Natl. Acad. Sci. USA* **111**, 11557–11562 (2014).
- 619 32. Dunand, C., Crèvecoeur, M. & Penel, C. Distribution of superoxide and hydrogen peroxide  
620 in *Arabidopsis* root and their influence on root development: possible interaction with  
621 peroxidases. *New Phytol.* **174**, 332–341 (2007).

- 622 33. Carlsbecker, A. et al. Cell signalling by microRNA165/6 directs gene dose-dependent root  
623 cell fate. *Nature* **465**, 316–321 (2010).
- 624 34. Helariutta, Y. et al. The SHORT-ROOT gene controls radial patterning of the *Arabidopsis*  
625 root through radial signaling. *Cell* **101**, 555–567 (2000).
- 626 35. Geng, Y. et al. A spatio-temporal understanding of growth regulation during the salt stress  
627 response in *Arabidopsis*. *Plant Cell* **25**, 2132–2154 (2013).
- 628 36. Volkening, K., Leystra-Lantz, C., Yang, W., Jaffee, H. & Strong, M. J. Tar DNA binding  
629 protein of 43 kDa (TDP-43), 14-3-3 proteins and copper/zinc superoxide dismutase (SOD1)  
630 interact to modulate NFL mRNA stability. Implications for altered RNA processing in  
631 amyotrophic lateral sclerosis (ALS). *Brain Res.* **1305**, 168–182 (2009).
- 632 37. Tsang, C. K., Liu, Y., Thomas, J., Zhang, Y. & Zheng, X. F. S. Superoxide dismutase 1  
633 acts as a nuclear transcription factor to regulate oxidative stress resistance. *Nat. Commun.*  
634 **5**, 3446 (2014).
- 635 38. Oparka, K. J. Plasmolysis: new insights into an old process. *New Phytol.* **126**, 571–591  
636 (1994).
- 637 39. Shavrukov, Y. Salt stress or salt shock: which genes are we studying? *J. Exp. Bot.* **64**, 119–  
638 127 (2013).
- 639 40. Morris, C. E. & Homann, U. Cell surface area regulation and membrane tension. *J.*  
640 *Membrane Biol.* **179**, 79–102 (2001).
- 641 41. Cordeiro, R. M. Reactive oxygen species at phospholipid bilayers: Distribution, mobility  
642 and permeation. *Biochim. Biophys. Acta (BBA) - Biomembranes* **1838**, 438–444 (2014).
- 643 42. Meng, L., Wong, J. H., Feldman, L. J., Lemaux, P. G. & Buchanan, B. B. A membrane-  
644 associated thioredoxin required for plant growth moves from cell to cell, suggestive of a  
645 role in intercellular communication. *Proc. Natl. Acad. Sci. USA* **107**, 3900–3905 (2010).

- 646 43. Marmagne, A. et al. Identification of new intrinsic proteins in *Arabidopsis* plasma  
647 membrane proteome. *Mol. Cell Proteomics* **3**, 675–691 (2004).
- 648 44. de Michele, R. et al. Free-flow electrophoresis of plasma membrane vesicles enriched by  
649 two-phase partitioning enhances the quality of the proteome from *Arabidopsis* seedlings. *J.*  
650 *Proteome Res.* **15**, 900–913 (2016).
- 651 45. Mitra, S. K., Walters, B. T., Clouse, S. D. & Goshe, M. B. An efficient organic solvent  
652 based extraction method for the proteomic analysis of *Arabidopsis* plasma membranes. *J.*  
653 *Proteome Res.* **8**, 2752–2767 (2009).
- 654 46. Hofmann, K. & Stoffel, W. TMBASE-A database of membrane spanning protein segments.  
655 *Biol. Chem. Hoppe-Seyler* **374:166** (1993).
- 656 47. Linkies, A. et al. Ethylene interacts with abscisic acid to regulate endosperm rupture during  
657 germination: a comparative approach using *Lepidium sativum* and *Arabidopsis thaliana*.  
658 *Plant Cell* **21**, 3803–3822 (2009).
- 659 48. Müller, K. et al. In vivo cell wall loosening by hydroxyl radicals during cress seed  
660 germination and elongation growth. *Plant Physiol.* **150**, 1855–1865 (2009).

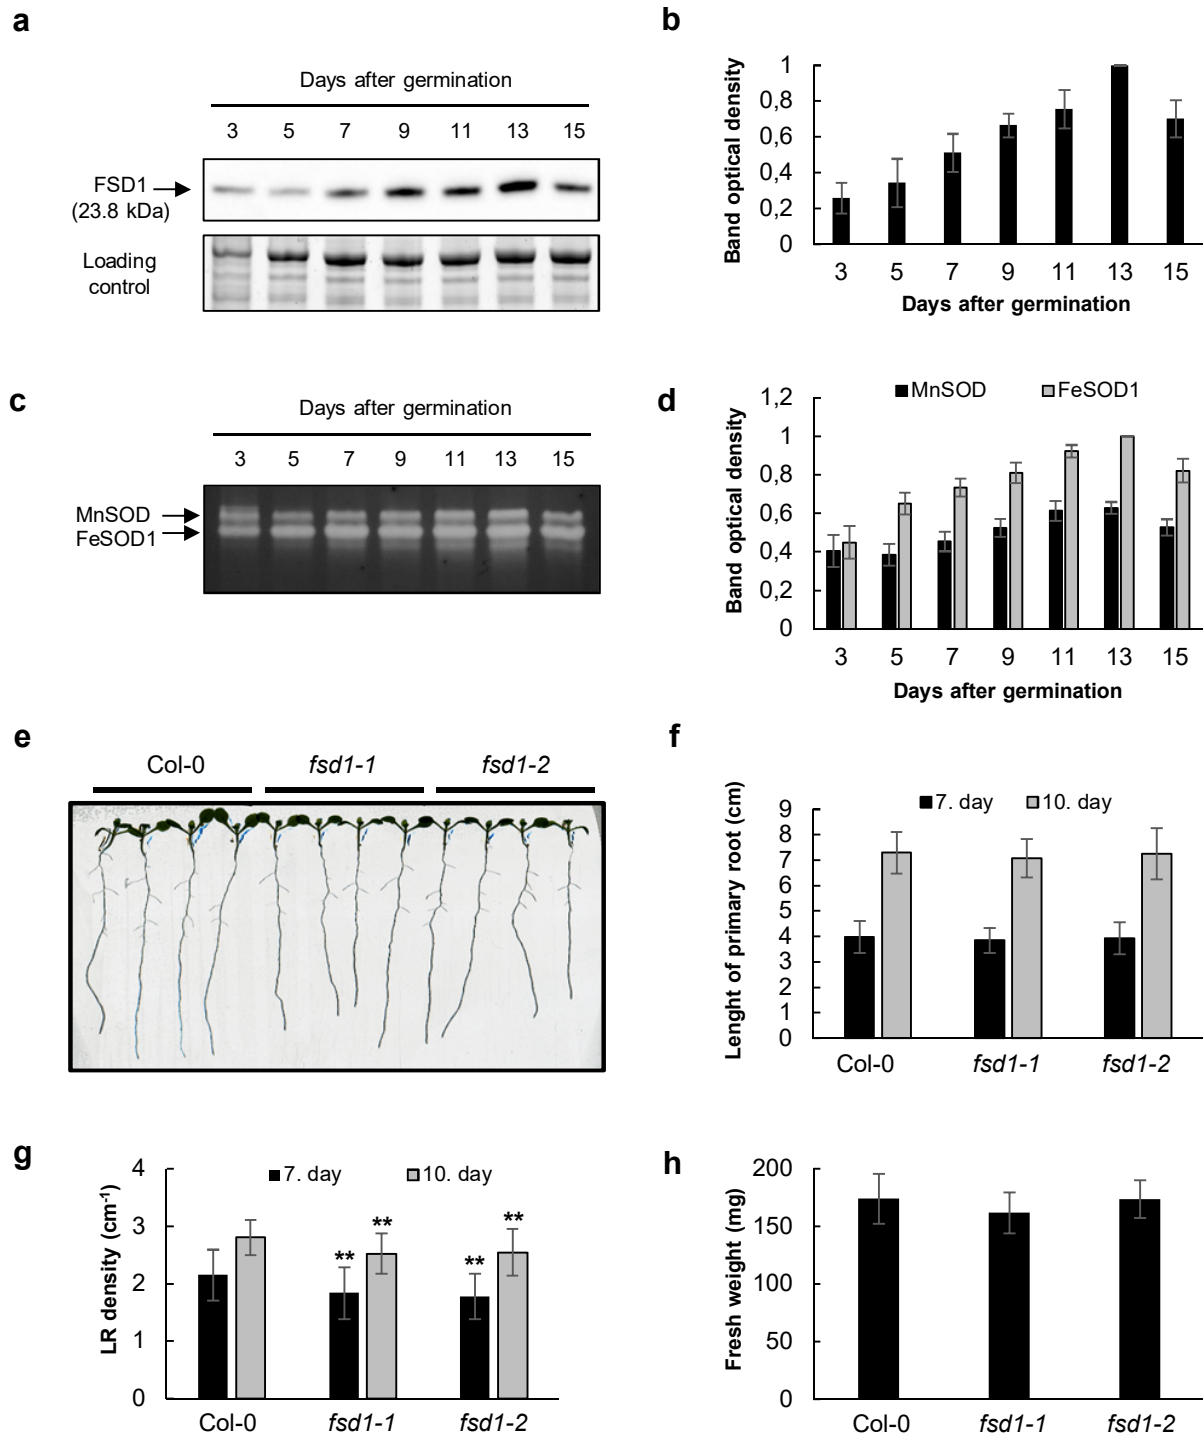

**Fig. 1. Early developmental and phenotypical analysis of iron superoxide dismutase 1 (FSD1).** **a**, Immunoblotting analysis of FSD1 abundance using anti-FSD1 antibody during early development of *Arabidopsis* (Col-0) seedlings. **b**, Quantification of optical densities of bands in **(a)**. The densities are expressed as relative to the highest value. **c**, Visualization of SOD isoform activities on native polyacrylamide gels during early development of *Arabidopsis* wild type (Col-0) seedlings. **d**, Quantification of optical densities of bands in **(c)**. The densities are expressed as relative to the highest value. **e**, Representative image of *fsd1-1* and *fsd1-2* mutant and Col-0 seedlings on 7<sup>th</sup> day after germination (DAG). **f-h**, Quantification of primary root length (**f**), lateral root density (**g**) of indicated seedlings on 7<sup>th</sup> and 10<sup>th</sup> DAG and fresh weight of seedlings on 14<sup>th</sup> DAG (**h**). Error bars represent standard deviation. Stars indicate statistically significant difference as compared to Col-0 (one-way ANOVA, \*\* $p < 0.01$ ).

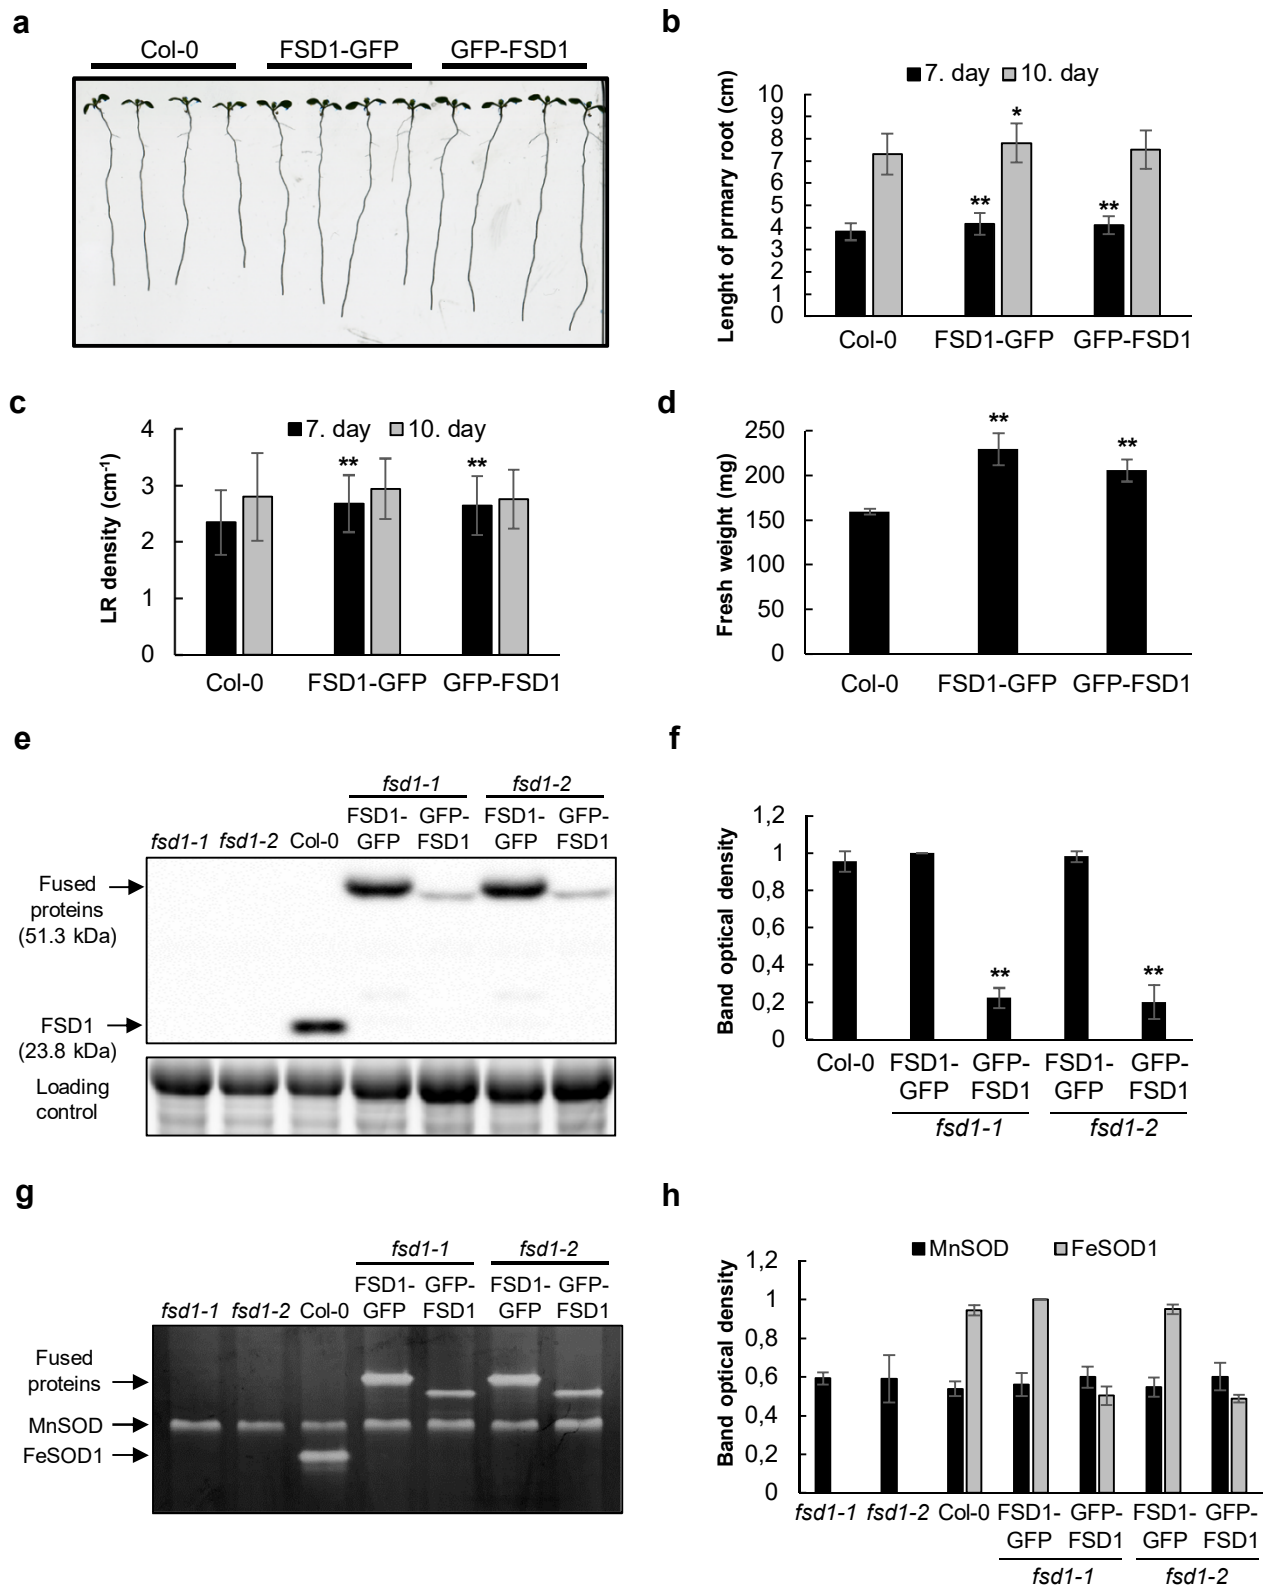

**Fig. 2. Phenotypic and functional analysis of *fsd1* complemented mutants.** **a**, Representative image of 7-day-old Arabidopsis wild type (Col-0) and *fsd1-1* mutant seedlings expressing *proFSD1::FSD1:GFP* or *proFSD1::GFP:FSD1*. **b,c**, Quantification of primary root length (**b**) and lateral root density (**c**) of indicated 7- and 10-day-old seedlings. **d**, Fresh weight of indicated 14-day-old seedlings. **e**, Immunoblotting analysis of FSD1, FSD1-GFP and GFP-FSD1 abundance in 14-day-old *fsd1* mutants, Col-0 and complemented *fsd1* mutants using anti-FSD antibody. **f**, Quantification of band optical densities in (**e**). The densities are expressed as relative to the highest value. **g**, Visualization of activities of SOD isoforms on native polyacrylamide gels in indicated plant lines. **h**, Quantification of optical densities of bands in (**g**). The densities are expressed as relative to the highest value. Error bars represent standard deviation. Stars indicate statistically significant difference as compared to Col-0 (one-way ANOVA, \* $p < 0.05$ , \*\* $p < 0.01$ ).

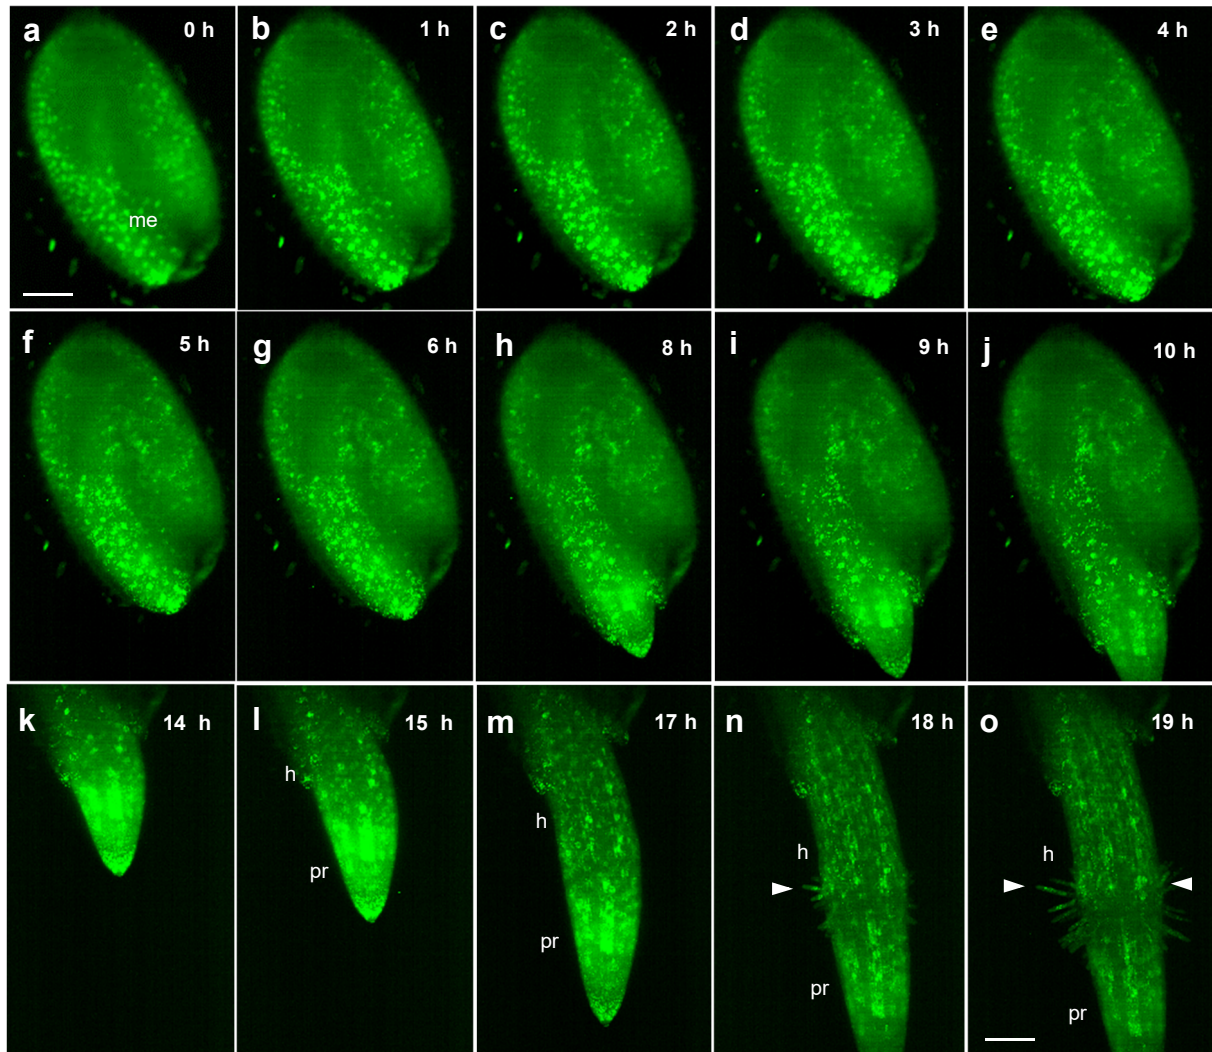

**Fig. 3. Time-lapse monitoring of FSD1-GFP distribution during seed germination obtained using light sheet fluorescence microscopy.** a-e, sequential accumulation and relocation of the signal in micropylar endosperm (me) to the site of radicle protrusion. e, testa rupture. f-h, radicle protrusion. h, endosperm rupture. k-o, primary root elongation. n,o, primary root differentiation. Arrowheads point to the site of root hairs in the collar region on the border between the elongating primary root (pr) and hypocotyl (h). Scale bar: 100  $\mu$ m.

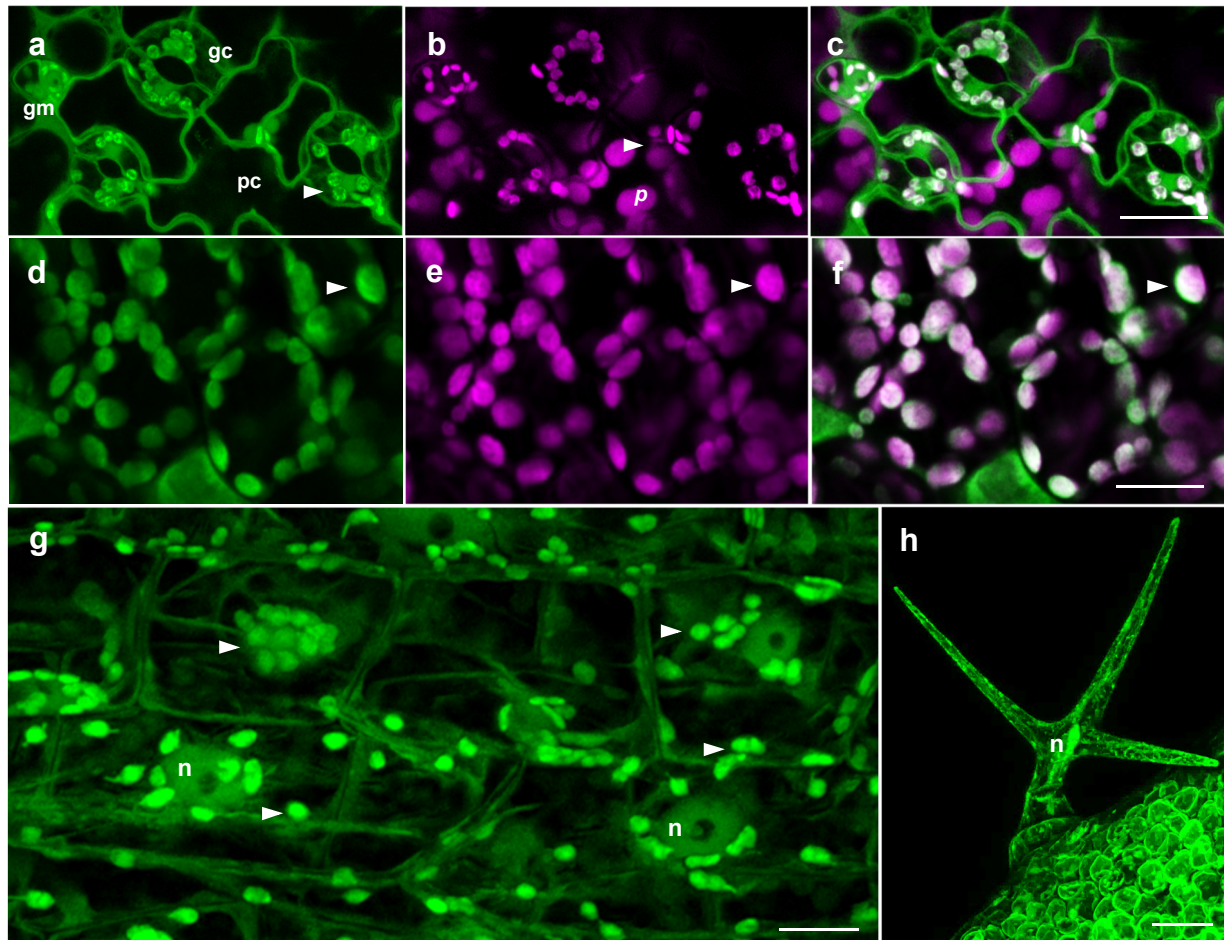

**Fig. 4. FSD1-GFP localization in cells of *Arabidopsis* aboveground organs revealed by Airyscan confocal laser scanning microscopy.** **a-c**, adaxial surface of cotyledons with pavement (*pc*), guard (*gc*) and guard mother (*gm*) cells. **d-f**, mesophyll cells. **g**, epidermal cells of hypocotyls. **h**, triple-branched leaf trichome. Indications: (*n*) nucleus. Arrowheads point on accumulation of FSD1-GFP in plastids. Channels: green - FSD1-GFP; magenta - chlorophyll *a* autofluorescence. Scale bars: **a-g**, 10  $\mu$ m; **h**, 20  $\mu$ m.



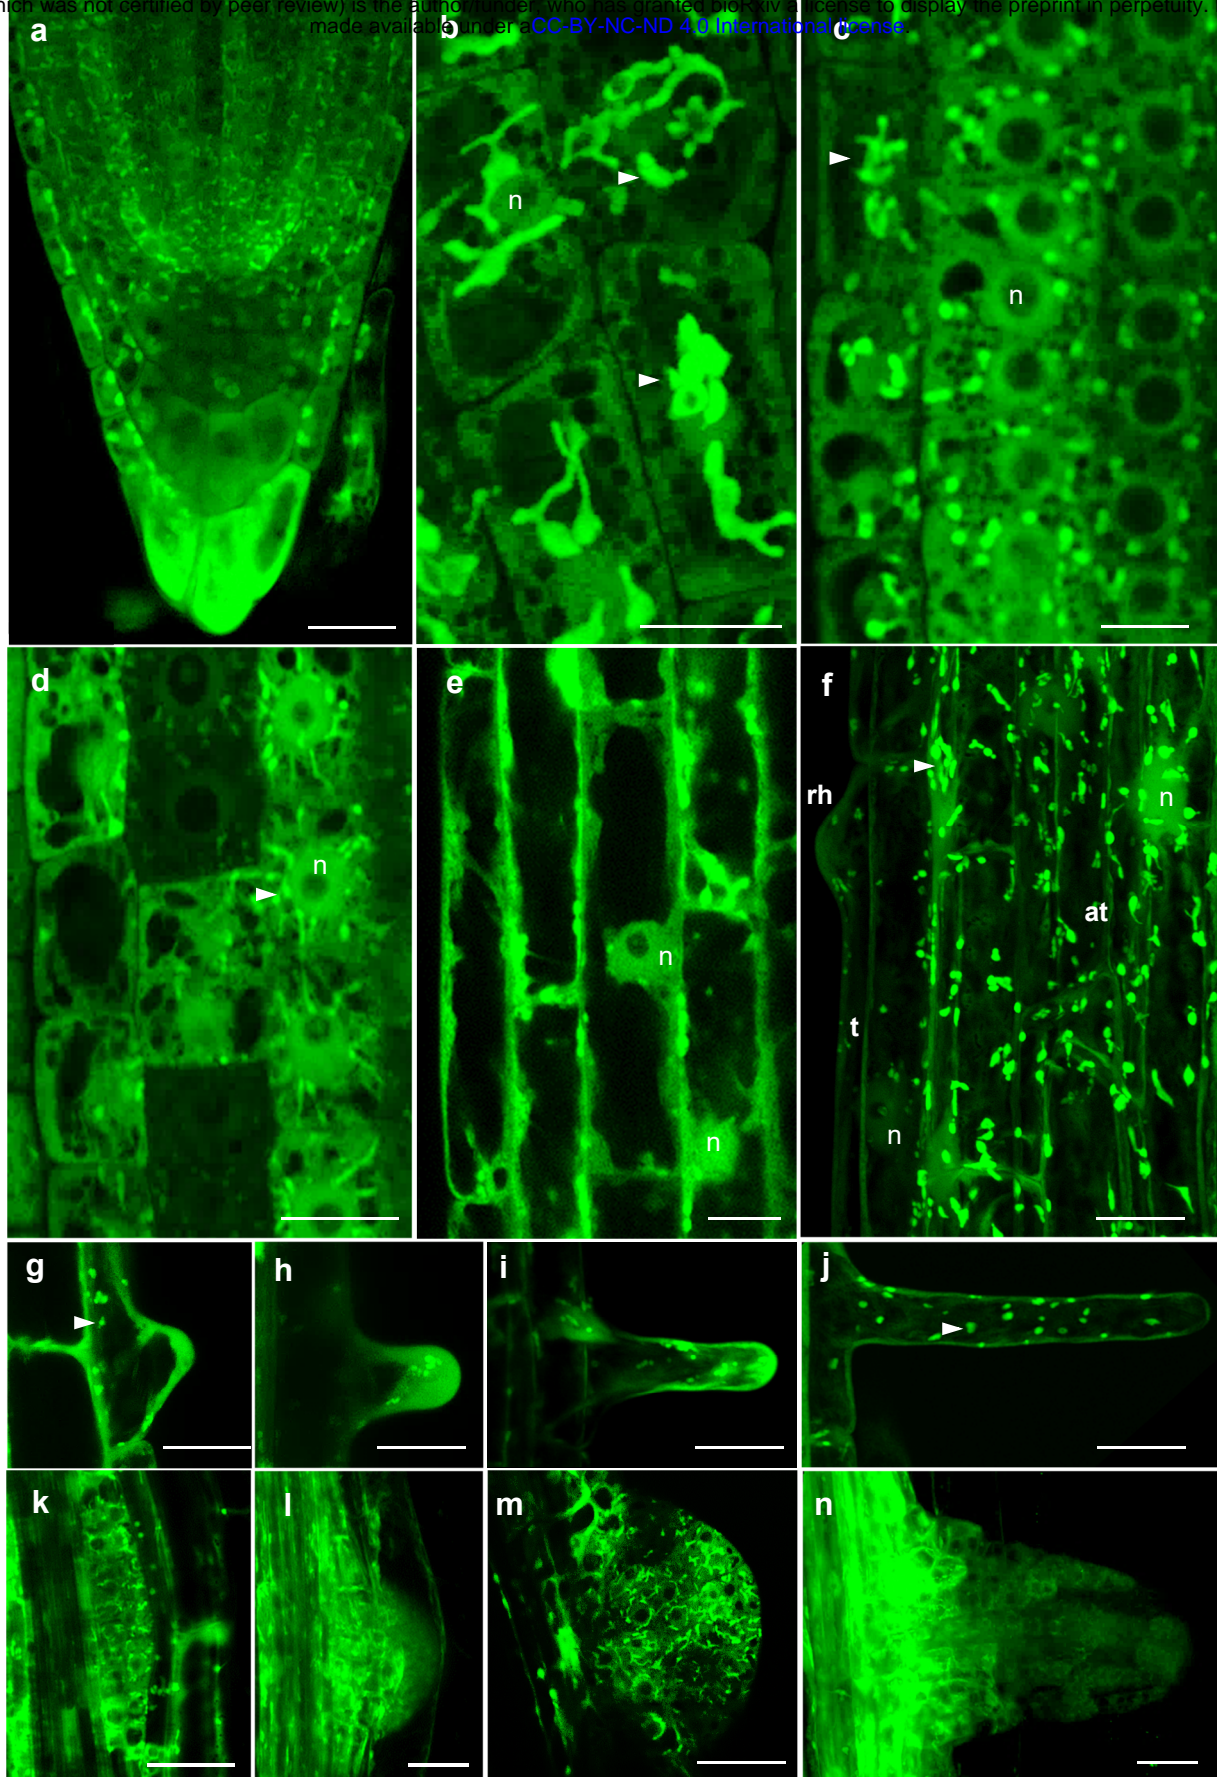

**Fig. 5. Tissue- and organ-specific subcellular FSD1-GFP localization in *Arabidopsis* roots revealed by Airyscan confocal laser scanning microscopy.** **a**, primary root apex. **b**, root cap cells with GFP-signal in plastids (arrowheads) and nuclei (n). **c**, epidermal and cortical meristem cells. **d**, cortical cells of distal elongation zone. **e**, cortical cells of elongation zone. **f**, trichoblasts (t) with an emerging root hair (rh) and atrichoblasts (at) of differentiation zone. **g-j**, mid-plane sections of root hairs. **g**, primordia. **h**, **i**, elongating root hair. **j**, mature root hair. **k-m**, mid-plane sections of forming lateral root primordia at diverse developmental stages, 4<sup>th</sup> day after germination (DAG). **n**, emerged lateral root, 8<sup>th</sup> DAG. Scale bars: **a**, **e**, **f**, **k-n**, 20  $\mu$ m; **b**, **c**, **d**, **g-j** 10  $\mu$ m.

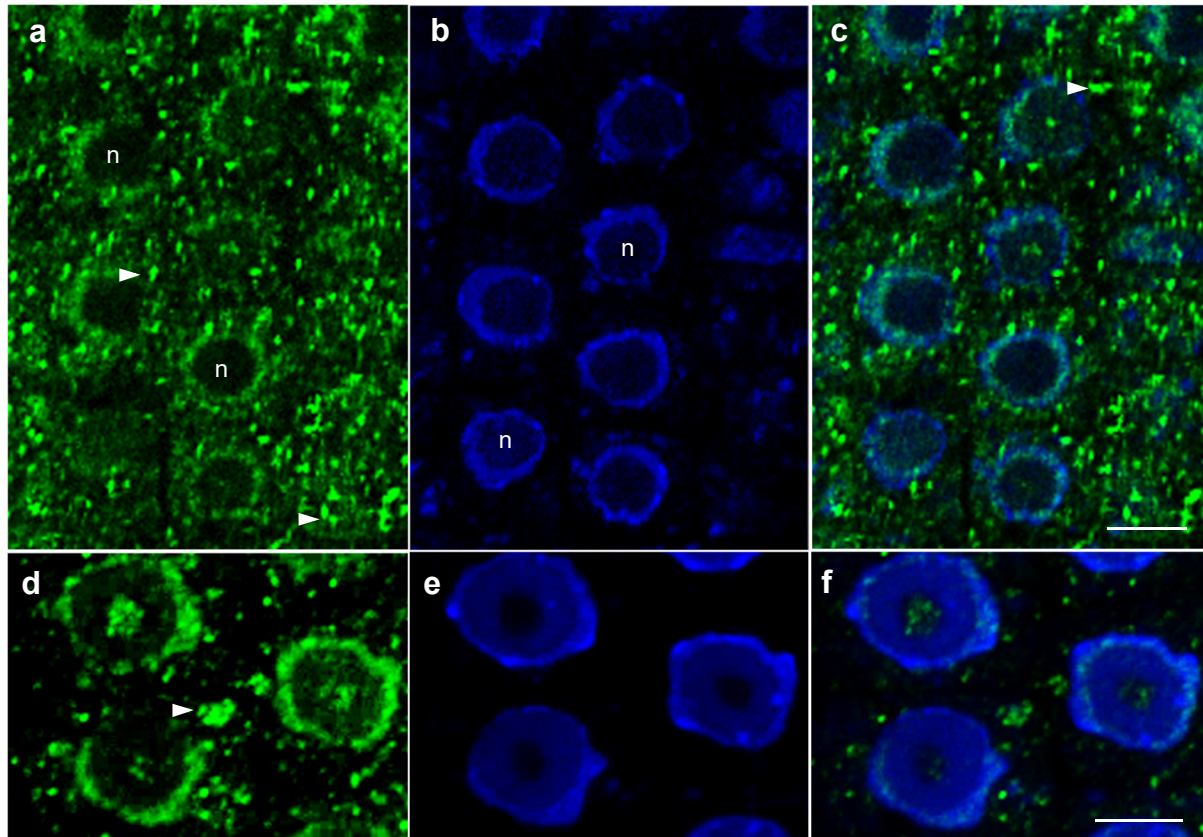

**Fig. 6. Overview of FSD1 immunolocalization in interphase meristematic cells of *Arabidopsis* (Col-0) primary roots.** The images represent maximum intensity projections of 20 optical sections (with thickness of 0.18  $\mu\text{m}$  each) at the mid-plane of root meristem cells with **a-c** or without **d-f** deconvolution in ZEN Blue 2012 software. Green immunolabelling with anti-FeSOD - Alexa Fluor 488; blue - DAPI staining. Arrowheads indicate plastids. (n) stands for nuclei. Scale bar: 5  $\mu\text{M}$ .

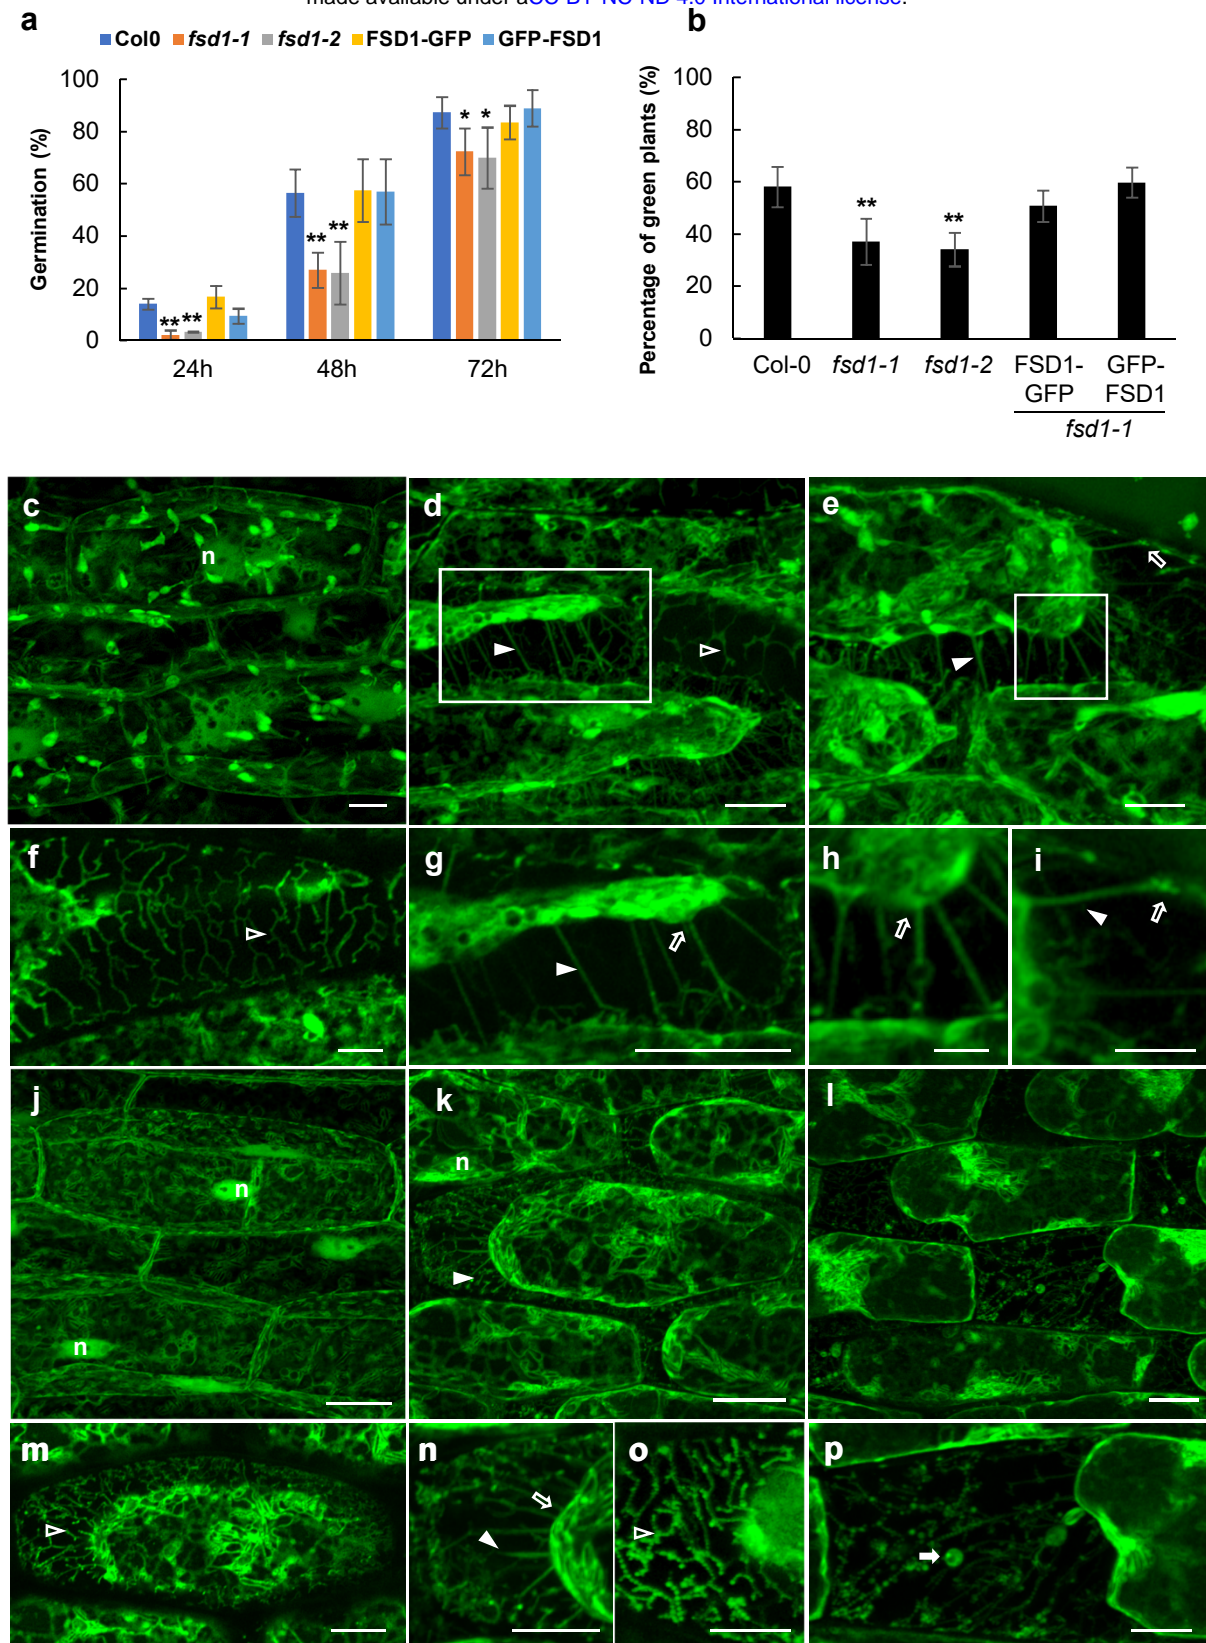

**Fig. 7. Response of *fsd1* mutants and complemented mutant lines to salt stress.** **a**, Seed germination efficiency on 150 mM NaCl. **b**, Viability of seedlings on 4<sup>th</sup> day after the transfer to 150mM NaCl-containing medium. Stars indicate statistically significant difference as compared to Col-0 (one-way ANOVA, \* $p < 0.05$ , \*\* $p < 0.01$ ). **c-i**, FSD1-GFP signal in hypocotyl epidermal cells on  $\frac{1}{2}$  MS (**c**) and 500 mM NaCl (15 min) (**d-i**). Images showing Hechtian reticulum (**f**) and strands (**g**) are close-ups from image (**d**). **h-i**, Hechtian strands and their connections to plasma membrane, close-ups from (**e**). **j-p**, GFP-FSD1 in hypocotyl epidermal cells exposed to  $\frac{1}{2}$  MS (**j**) and 500 mM NaCl (**k-p**) for 15 min. Hechtian reticulum (**m**) and strands (**o**) are close-ups from (**k**). Disturbed Hechtian reticulum with aggregations (**p**) is close-up from (**l**). Filled arrowheads indicate Hechtian strands; blank arrowheads - Hechtian reticulum; filled arrows - globular aggregations; blank arrows - connections of Hechtian strands to plasma membrane and cell wall. Scale bar: **a-g, j-p**, 10  $\mu$ m; **h,i**, 5  $\mu$ m.

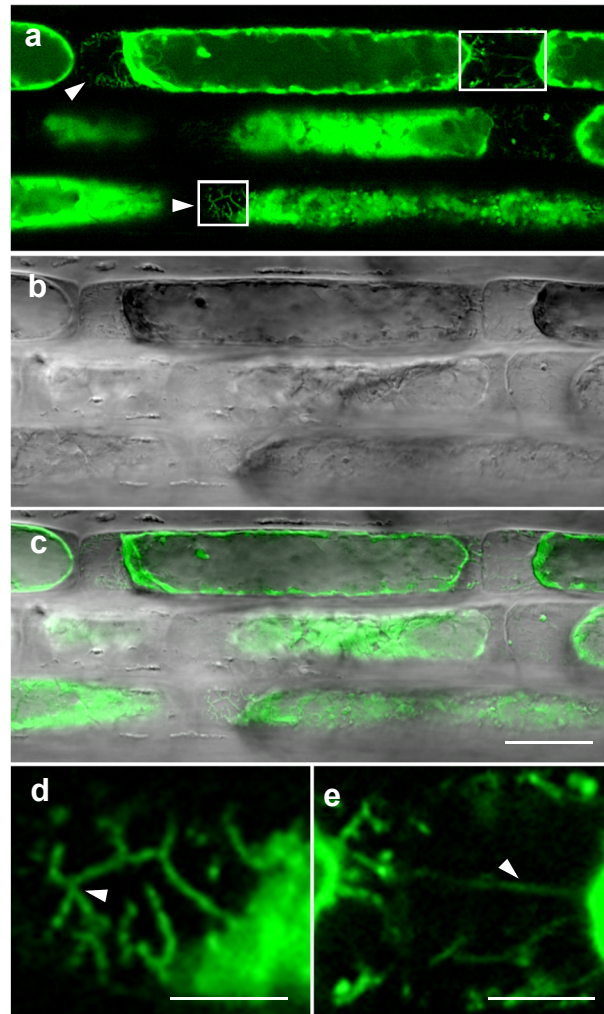

**Fig. 8. Accumulation of reactive oxygen species (ROS) in *Arabidopsis* primary root in response to salt stress.** Plasmolysis was induced by the treatment of 4-day-old seedlings with liquid  $\frac{1}{2}$  MS medium containing 250 mM NaCl for 15 min. **a-e**, ROS distribution during the plasmolysis visualized by fluorescent tracker CM-H<sub>2</sub>DCFDA. **b**, transmitted light. **c**, overlay. **d**, **e**, details of ROS accumulation on Hechtian strands and reticulum (arrows) (close-ups from **(a)**, areas in squares). Scale bars: **a,b,d** 20  $\mu$ m; **c,e**, 10  $\mu$ m.
